## Correction: Real time *ex vivo* chemosensitivity assay for pancreatic adenocarcinoma

**Dae Won Kim<sup>1,\*</sup>, Francisca Beato<sup>1,\*</sup>, Youngchul Kim<sup>2</sup>, Alexandra F. Tassielli<sup>1</sup>, Ruifan Dai<sup>1</sup>, Jason W. Denbo<sup>1</sup>, Pamela J. Hodul<sup>1</sup>, Mokenge P. Malafa<sup>1</sup> and Jason B. Fleming<sup>1</sup>**

<sup>1</sup>Department of Gastrointestinal Oncology, Moffitt Cancer Center, Tampa, FL 33612, USA

<sup>2</sup>Department of Biostatistics and Bioinformatics, Moffitt Cancer Center, Tampa, FL 33612, USA

\*These authors contributed equally to this work

**Published:** July 02, 2024

**Copyright:** © 2024 Kim et al. This is an open access article distributed under the terms of the [Creative Commons Attribution License](#) (CC BY 4.0), which permits unrestricted use, distribution, and reproduction in any medium, provided the original author and source are credited.

**This article has been corrected:** The following author has been added to this paper.

Bhaswati Sarcar

Department of Gastrointestinal Oncology, Moffitt Cancer Center, Tampa, FL 33612, USA

Original article: Oncotarget. 2023; 14:811–818. <https://doi.org/10.18632/oncotarget.28508>
